# Supplementary material for: A proteomic approach for the identification of biomarkers in endometrial cancer uterine aspirate
Source: PubMed Central journal article supplement (PMC5752540; doi:10.18632/oncotarget.22725), 2017-11-30
Supplement: oncotarget-08-109536-s001.pdf [file oncotarget-08-109536-s001.pdf]

## A proteomic approach for the identification of biomarkers in endometrial cancer uterine aspirate

### SUPPLEMENTARY MATERIALS

**Supplementary Table 1: Clinico-pathological characteristics of the 16 women enrolled in the study**

| Sample type | Age | Diagnosis                       | Grade |
|-------------|-----|---------------------------------|-------|
| Control     | 44  | Hyperplastic endometrium        |       |
| Control     | 36  | Normal Endometrium              |       |
| Control     | 42  | Normal Endometrium              |       |
| Control     | 44  | Endometrial polyp               |       |
| Control     | 42  | Normal Endometrium              |       |
| Control     | 44  | Normal Endometrium              |       |
| Tumor       | 69  | Endometrioid adenocarcinoma     | G2    |
| Tumor       | 60  | Endometrioid adenocarcinoma     | G1    |
| Tumor       | 86  | Endometrioid adenocarcinoma     | G3    |
| Tumor       | 68  | Endometrioid adenocarcinoma     | G2    |
| Tumor       | 71  | Endometrioid adenocarcinoma     | G2    |
| Tumor       | 77  | Endometrioid adenocarcinoma     | G2    |
| Tumor       | 67  | Endometrioid adenocarcinoma     | G2-G3 |
| Tumor       | 77  | Endometrioid adenocarcinoma     | G2    |
| Tumor       | 75  | Endometrioid adenocarcinoma     | G2    |
| Tumor       | 74  | Serous papillary adenocarcinoma |       |

Supplementary Table 2: For single spots, cut-offs for sensitivity and specificity for the identification of the diseased

| SPOT | Cut-off | Sensitivity | Specificity | AUC   | 95%CI         | p-value* |
|------|---------|-------------|-------------|-------|---------------|----------|
| 1    | <0.20   | 75.0%       | 100%        | 0.898 | 0.732 - 1.000 | 0.007    |
|      | <1.00   | 87.5%       | 75.0%       |       |               | 0.041    |
| 2    | <0.35   | 87.5%       | 75.0%       | 0.836 | 0.610 - 1.000 | 0.041    |
| 3    | ≥0.13   | 100%        | 100%        | 1.000 | 1.000 - 1.000 | 0.002    |
| 4    | ≥0.02   | 100%        | 66.7%       | 0.944 | 0.816 - 1.000 | 0.061    |
|      | ≥0.08   | 83.3%       | 100.0%      |       |               | 0.015    |
| 5    | ≥0.04   | 100%        | 87.5%       | 0.953 | 0.851 - 1.000 | 0.000    |
| 6    | ≥0.13   | 100%        | 100%        | 1.000 | 1.000 - 1.000 | 0.008    |
| 7    | ≥0.02   | 100%        | 100%        | 1.000 | 1.000 - 1.000 | 0.008    |
| 8    | ≥0.10   | 100%        | 100%        | 1.000 | 1.000 - 1.000 | 0.002    |
| 9    | ≥0.11   | 100%        | 100%        | 1.000 | 1.000 - 1.000 | 0.008    |
| 10   | ≥0.20   | 100%        | 100%        | 1.000 | 1.000 - 1.000 | 0.002    |
| 11   | ≥0.12   | 100%        | 70.0%       | 0.910 | 0.787 - 1.000 | 0.003    |
| 12   | ≥0.09   | 100%        | 100%        | 1.000 | 1.000 - 1.000 | 0.008    |
| 13   | ≥0.0015 | 100%        | 100%        | 1.000 | 1.000 - 1.000 | 0.008    |
| 14   | ≥0.03   | 100%        | 100%        | 1.000 | 1.000 - 1.000 | 0.008    |
| 15   | ≥0.09   | 100%        | 100%        | 1.000 | 1.000 - 1.000 | 0.008    |
| 16   | ≥0.03   | 100%        | 42.9%       | 0.755 | 0.486 - 1.000 | 0.192    |
|      | ≥0.15   | 71.4%       | 71.4%       |       |               | 0.286    |
| 17   | ≥0.03   | 100%        | 66.7%       | 0.917 | 0.759 - 1.000 | 0.061    |
|      | ≥0.07   | 83.3%       | 83.3%       |       |               | 0.080    |
| 18   | ≥0.06   | 100%        | 100%        | 1.000 | 1.000 - 1.000 | 0.008    |
| 19   | ≥0.20   | 100%        | 100%        | 1.000 | 1.000 - 1.000 | 0.008    |
| 20   | ≥0.12   | 100%        | 100%        | 1.000 | 1.000 - 1.000 | 0.008    |
| 21   | ≥0.12   | 100%        | 100%        | 1.000 | 1.000 - 1.000 | 0.000    |
| 22   | ≥0.20   | 100%        | 33.3%       | 0.741 | 0.505 - 0.977 | 0.206    |
|      | ≥0.26   | 77.8%       | 44.4%       |       |               | 0.620    |
|      | ≥0.32   | 55.6%       | 88.9%       |       |               | 0.131    |
| 23   | ≥0.05   | 100%        | 100%        | 1.000 | 1.000 - 1.000 | 0.002    |
| 24   | ≥0.12   | 85.7%       | 85.7%       | 0.929 | 0.803 - 1.000 | 0.029    |
|      | ≥0.17   | 71.4%       | 100%        |       |               | 0.021    |
| 25   | ≥0.10   | 100%        | 100%        | 1.000 | 1.000 - 1.000 | 0.001    |
| 26   | ≥0.40   | 100%        | 33.3%       | 0.747 | 0.511 - 0.983 | 0.206    |
|      | ≥0.60   | 88.9%       | 55.6%       |       |               | 0.131    |

\*p-value calculated with two-tailed Fisher exact test.
